# Supplementary material for: Effects of hydraulic retention time and influent nitrate concentration on solid-phase denitrification system using wheat husk as carbon source
Source: PeerJ. 2023 Jul 24;11:e15756. doi: 10.7717/peerj.15756 (PMC10373648; doi:10.7717/peerj.15756)
Supplement: Supplemental Information 2 [file peerj-11-15756-s002.docx]

Table S1 Composition of artificial synthetic culture wastewater

| Component | Concentration (mg/L) |
| --- | --- |
| KNO3 | 360 |
| NH4Cl | 21.2 |
| NaNO2 | 12.3 |
| K2HPO4 | 78 |
| KH2PO4 | 44 |
| MgSO4 ∙7H2O | 44 |
| KCl | 37 |
| Trace elements 0.2% (V/V) |  |
| EDTA | 640 |
| FeSO4 ∙7H2O | 550 |
| ZnSO4 ∙7H2O | 230 |
| MnSO4 ∙H2O | 340 |
| CuSO4 ∙5H2O | 75 |
| Co(NO3 )2 ∙6H2O | 47 |
| (NH4)6 Mo7O24 ∙4H2O | 25 |
