# Supplementary material for: Effects of hydraulic retention time and influent nitrate concentration on solid-phase denitrification system using wheat husk as carbon source
Source: PeerJ. 2023 Jul 24;11:e15756. doi: 10.7717/peerj.15756 (PMC10373648; doi:10.7717/peerj.15756)
Supplement: Supplemental Information 4 [file peerj-11-15756-s004.xlsx]

## Sheet: Sheet1
Figure 2A	TN (mg/g)			NO3−-N (mg/L)			NO2−-N (mg/L)				Figure 2B	TP (mg/L)				Figure 2C	COD (mg/L)				Figure 2D	NO3--N removal efficiency (%)				Figure 2E	TN removal efficiency (%)				Figure 2F	TP removal efficiency (%)				Figure 2G	COD (mg/L)
Time	group 1	group 2	group 3	group 1	group 2	group 3	group 1	group 2	group 3		Time	group 1	group 2	group 3		Time	group 1	group 2	group 3		HRT	group 1	group 2	group 3		HRT	group 1	group 2	group 3		HRT	group 1	group 2	group 3		HRT	group 1	group 2	group 3
2d	15.9	13.16	12.62	9.98926	10.7316	9.11197	0.69551	0.64589	0.414816		2d	3.12334	3.0265	2.15502		2d	61	80	67		24h	80.0215	78.5369	81.7761		24h	72.5862	77.3103	78.2414		24h	86.9207	87.3262	90.9756		24h	61	80	67
4d	12.09	13.446	14.408	10.9762	9.38133	8.69726	0.770492	0.827532	0.63219		4d	3.08702	2.79048	1.97346		4d	64	49	52		24h	78.0476	81.2373	82.6055		24h	79.1552	76.8172	75.1586		24h	87.0728	88.3146	91.7359		24h	64	49	52
6d	16.11	16.79	15.58	12.8742	14.8649	9.49157	0.205671	0.921165	0.497373		6d	4.41241	2.77837	5.67728		6d	72	38	54		24h	74.2517	70.2702	81.0169		24h	72.2241	71.0517	73.1379		24h	81.5226	88.3653	76.2258		24h	72	38	54
8d	14.22	13.642	18.05	12.4315	13.9917	9.57592	0.565253	0.32859	0.389131		8d	5.86489	3.71038	2.91152		8d	72	78	60		24h	75.1371	72.0166	80.8482		24h	75.4828	76.4793	68.8793		24h	75.4402	84.4624	87.8077		24h	72	78	60
10d	20.89	15.65	22.04	15.8034	17.4102	19.9452	2.23841	1.59094	2.17039		10d	4.98735	4.60002	4.56976		10d	19	52	40		24h	68.3931	65.1796	60.1096		24h	63.9828	73.0172	62		24h	79.1149	80.7369	80.8636		24h	19	52	40
12d	22.77	22.82	22	15.8012	13.3787	18.8241	1.22387	1.78343	2.52644		12d	5.35047	4.65449	3.95851		12d	21	34	43		24h	68.3975	73.2427	62.3518		24h	60.7414	60.6552	62.069		24h	77.5943	80.5088	83.4233		24h	21	34	43
14d	18.87	15.37	20.91	18.9055	15.8772	14.848	1.90804	1.71738	2.19974		14d	4.50319	4.13402	4.5274		14d	46	59	32		24h	62.1891	68.2457	70.3039		24h	67.4655	73.5	63.9483		24h	81.1424	82.6884	81.041		24h	46	59	32
16d	5.452	4.389	5.698	3.2325	1.42732	0.524736	0.368951	0.312078	0.24146		16d	3.20806	4.45478	3.53487		16d	78	98	94		28h	93.535	97.1454	98.9505		28h	90.6	92.4328	90.1759		28h	86.5659	81.3452	85.1974		28h	78	98	94
18d	8.488	6.858	9.3	3.20719	2.24556	6.3536	0.414816	0.493704	0.796413		18d	3.35936	3.1778	2.7118		18d	55	54	60		28h	93.5856	95.5089	87.2928		28h	85.3655	88.1759	83.9655		28h	85.9323	86.6926	88.6441		28h	55	54	60
20d	9.904	9	11.63	3.86515	5.29698	7.61047	0.146964	0.249702	0.337705		20d	2.99019	3.49856	2.33658		20d	34	42	35		28h	92.2697	89.406	84.7791		28h	82.9241	84.4828	79.9483		28h	87.4783	85.3494	90.2153		28h	34	42	35
22d	9.154	8.784	5.327	3.29155	4.27849	2.48175	0.597401	0.67166	0.78357		22d	4.18244	2.35473	3.11728		22d	26	37	54		28h	93.4169	91.443	95.0365		28h	84.2172	84.8552	90.8155		28h	82.4856	90.1393	86.946		28h	26	37	54
24d	6.966	12.21	10.257	2.35522	8.21782	1.31766	0.157972	0.205643	0.191926		24d	2.72996	1.9553	2.15502		24d	58	60	38		28h	95.2896	83.5644	97.3647		28h	87.9897	78.9483	82.3155		28h	88.568	91.812	90.9756		28h	58	60	38
26d	9.936	8.9	4.272	5.85591	7.34435	3.03005	0.15512	0.113941	0.249702		26d	2.28211	3.85563	2.01582		26d	66	43	64		28h	88.2882	85.3113	93.9399		28h	82.869	84.6552	92.6345		28h	90.4434	83.8542	91.5585		28h	66	43	64
28d	6.68	6.111	4.364	3.19876	3.16502	0.107919	0.282725	0.186422	0.17358		28d	2.97204	1.87057	2.21554		28d	43	44	63		28h	93.6025	93.67	99.7842		28h	88.4828	89.4638	92.4759		28h	87.5543	92.1668	90.7222		28h	43	44	63
30d	6.31	5.691	2.18	3.98325	2.09372	0.259756	0.0165646	0.0680764	0.0093692		30d	4.79369	2.8752	4.11586		30d	66	42	64		28h	92.0335	95.8126	99.4805		28h	89.1207	90.1879	96.2414		28h	79.9259	87.9598	82.7644		28h	66	42	64
32d	0.9	0.222	1.1	0.25132	0.183837	0.25132	0.0057	0.0112038	0.0001962		32d	5.71359	5.07813	4.50319		32d	43	38	24		32h	99.4974	99.6323	99.4974		32h	98.4483	99.6172	98.1034		32h	76.0737	78.7348	81.1424		32h	43	38	24
34d	1.5	0.602	0.9	0.352545	0.175402	0.285062	0.0016384	0.0368882	0.0075346		34d	4.62423	2.77232	2.01582		34d	54	67	68		32h	99.2949	99.6492	99.4299		32h	97.4138	98.9621	98.4483		32h	80.6355	88.3906	91.5585		32h	54	67	68
36d	0.8	2.177	1.48	0.276627	0.0776602	0.226014	0.0130384	0.185491	0.0222114		36d	3.79511	4.76948	2.43341		36d	46	64	49		32h	99.4467	99.8447	99.548		32h	98.6207	96.2466	97.4483		32h	84.1076	80.0273	89.8098		32h	46	64	49
38d	2	4.744	3.023	0.301933	1.76474	0.301933	0.0291574	0.669825	0.0328266		38d	2.37289	2.2579	5.86489		38d	40	24	38		32h	99.3961	96.4705	99.3961		32h	96.5517	91.8207	94.7879		32h	90.0633	90.5448	75.4402		32h	40	24	38
40d	0.5	4.503	1.755	0.217579	2.51549	0.0066938	0.0419996	0.322943	0.0644072		40d	2.26395	5.16891	2.60286		40d	60	51	75		32h	99.5648	94.969	99.9866		32h	99.1379	92.2362	96.9741		32h	90.5195	78.3546	89.1002		32h	60	51	75
42d	5	7.47	4.936	0.166966	6.00775	0.49943	0.0071422	0.895195	0.069911		42d	0.86594	0.544176	3.15965		42d	42	49	27		32h	99.6661	87.9845	99.0011		32h	91.3793	87.1207	91.4897		32h	96.3738	97.7212	86.7686		32h	42	49	27
44d	8.232	3.57	5.695	2.23712	1.6902	0.541607	1.49173	1.74095	1.76318		44d	3.27464	0.539132	3.26858		44d	66	52	54		32h	95.5258	96.6196	98.9168		32h	85.8069	93.8448	90.181		32h	86.2871	97.7423	86.3125		32h	66	52	54
46d	6.55556	8.02639	6.78445	4.50625	5.05755	3.6597	1.49723	1.05466	1.16531		46d	2.61497	1.01119	3.18386		46d	40	50	45		32h	90.9875	89.8849	92.6806		32h	88.6973	86.1614	88.3027		32h	89.0495	95.7655	86.6673		32h	40	50	45
48d	2.92	5.13	4.733	0.0186124	1.81835	2.03467	0.0277152	1.0843	0.207506		48d	2.59681	1.338	2.39104		48d	69	64	92		36h	99.9628	96.3633	95.9307		36h	94.9655	91.1552	91.8397		36h	89.1256	94.397	89.9873		36h	69	64	92
50d	2.209	6.31	6.38	0.0657416	1.95032	2.00093	0.033219	1.01656	0.161641		50d	2.53024	2.50603	1.73138		50d	19	15	15		36h	99.8685	96.0994	95.9981		36h	96.1914	89.1207	89		36h	89.4044	89.5057	92.7497		36h	19	15	15
52d	2.685	4.435	5.32	0.0657416	0.0657416	1.46107	0.0071422	0.0108114	0.710186		52d	3.00835	2.29421	2.4213		52d	18	29	17		36h	99.8685	99.8685	97.0779		36h	95.3707	92.3534	90.8276		36h	87.4022	90.3927	89.8605		36h	18	29	17
54d	1.046	0.486	4.196	0.285062	0.23445	0.153579	0.0199844	0.0254882	0.308409		54d	2.61497	2.66338	2.8631		54d	37	13	27		36h	99.4299	99.5311	99.6928		36h	98.1966	99.1621	92.7655		36h	89.0495	88.8468	88.0105		36h	37	13	27
56d	1.48853	1.55542	1.52301	0.158531	0.226014	0.183837	0.0181498	0.0273228	0.0273228		56d	3.85563	2.62707	3.69828		56d	40	46	34		36h	99.6829	99.548	99.6323		36h	97.4336	97.3182	97.3741		36h	83.8542	88.9989	84.5131		36h	40	46	34
58d	1.56714	1.59092	1.53077	0.192273	0.192273	0.150096	0.0199844	0.0291574	0.0181498		58d	2.88731	3.6075	3.45014		58d	31	31	21		36h	99.6155	99.6155	99.6998		36h	97.298	97.257	97.3607		36h	87.9091	84.8932	85.5522		36h	31	31	21
60d	1.54967	1.72203	1.65192	0.0657416	0.293497	0.217579	0.0442266	0.0236536	0.021819		60d	4.56976	4.58792	4.12797		60d	11	28	23		36h	99.8685	99.413	99.5648		36h	97.3282	97.031	97.1519		36h	80.8636	80.7876	82.7137		36h	11	28	23
Figure 3A	TN (mg/g)			NO3−-N (mg/L)			NO2−-N (mg/L)				Figure 3B	TP (mg/L)				Figure 3C	COD (mg/L)				Figure 3D	NO3--N removal rate (mg/(L·d))				Figure 3E	TN removal efficiency (%)				Figure 3F	TP removal efficiency (%)				Figure 3G	COD (mg/L)
Time	group 1	group 2	group 3	group 1	group 2	group 3	group 1	group 2	group 3		Time	group 1	group 2	group 3		Time	group 1	group 2	group 3		INC (mg/L)	group 1	group 2	group 3		INC (mg/L)	group 1	group 2	group 3		INC (mg/L)	group 1	group 2	group 3		INC (mg/L)	group 1	group 2	group 3
2d	8.107	10.13	11.2	5.82217	3.82298	5.56067	2.20693	0.676878	1.94826		2d	4.20059	4.55766	4.6908		2d	57	55	67		75	51.8834	53.3828	52.0795		75	90.2325	87.7952	86.506		75	82.4096	80.9143	80.3568		75	57	55	67
4d	7.441	12.56	12.14	5.95713	7.62734	6.48013	2.23078	2.94628	2.55918		4d	5.16286	5.24154	5.62281		4d	46	52	63		75	51.7821	50.5295	51.3899		75	91.0349	84.8675	85.3735		75	78.38	78.0505	76.4539		75	46	52	63
6d	9.164	14.81	11.84	7.15496	12.3006	8.89265	2.82519	3.67278	3.40126		6d	4.18244	4.07955	4.15823		6d	49	50	68		75	50.8838	47.0246	49.5805		75	88.959	82.1566	85.7349		75	82.4856	82.9164	82.587		75	49	50	68
8d	16.93	16.43	18.25	15.447	11.9969	13.1947	3.57004	3.64343	3.78286		8d	3.19596	3.6196	3.3291		8d	77	65	89		75	44.6648	47.2523	46.354		75	79.6024	80.2048	78.012		75	86.6166	84.8425	86.059		75	77	65	89
10d	16.35	11.62	16.21	18.6777	8.35279	16.8472	3.66177	3.45263	3.69846		10d	3.89799	3.74064	3.96456		10d	42	25	23		75	42.2417	49.9854	43.6146		75	80.3012	86	80.4699		75	83.6768	84.3357	83.398		75	42	25	23
12d	18.72	13.39	18.65	17.075	12.8995	18.5934	3.57371	3.69113	3.67645		12d	3.43804	3.70433	4.06745		12d	54	50	50		75	43.4438	46.5754	42.305		75	77.4458	83.8675	77.5301		75	85.6028	84.4877	82.9671		75	54	50	50
14d	19.81	19.38	20.64	11.6048	9.22602	13.5196	1.45475	1.35018	1.46942		14d	4.17033	4.35794	4.29742		14d	30	68	17		75	47.5464	49.3305	46.1103		75	76.1325	76.6506	75.1325		75	82.5363	81.7507	82.0041		75	30	68	17
16d	17.73	17.537	18.41	16.7673	16.9275	17.9904	3.73699	3.66911	3.73332		16d	3.75132	1.76627	2.14754		16d	40	51	36		100	62.4246	62.3043	61.5072		100	83.5833	83.762	82.9537		100	84.2909	92.6036	91.0069		100	40	51	36
18d	11.19	14.04	11.397	10.3223	13.5193	10.2632	0.14513	1.02545	0.205671		18d	4.25364	4.67123	3.77553		18d	34	37	43		100	67.2583	64.8605	67.3026		100	89.6389	87	89.4472		100	82.1874	80.4387	84.1896		100	34	37	43
20d	17.81	15.51	17.35	14.9155	2.45644	8.23469	3.53885	1.42201	3.25449		20d	4.296	3.69686	4.54414		20d	33	31	42		100	63.8134	73.1577	68.824		100	83.5093	85.6389	83.9352		100	82.01	84.519	80.971		100	33	31	42
22d	22.82	19.95	22.33	15.9109	2.79386	10.2676	3.56087	0.840443	3.26183		22d	4.01156	3.8421	3.83		22d	34	37	46		100	63.0668	72.9046	67.2993		100	78.8704	81.5278	79.3241		100	83.2012	83.9108	83.9615		100	34	37	46
24d	24.51	23.25	22.87	18.0113	8.74925	13.4899	3.54619	0.719073	3.24715		24d	3.87842	4.86489	4.50782		24d	20	24	27		100	61.4915	68.4381	64.8825		100	77.3056	78.4722	78.8241		100	83.7587	79.6278	81.123		100	20	24	27
26d	30.5	31.2	29.11	12.1656	10.0061	16.6026	3.40126	2.59954	3.5572		26d	4.09629	4.1326	4.31416		26d	32	22	43		100	65.8758	67.4954	62.548		100	71.7593	71.1111	73.0463		100	82.8464	82.6943	81.934		100	32	22	43
28d	20.95	20.2	20.07	9.57592	8.09973	11.5161	3.46364	3.04902	3.65076		28d	4.05392	3.93894	4.26574		28d	20	9	7		100	67.8181	68.9252	66.363		100	80.6019	81.2963	81.4167		100	83.0238	83.5053	82.1368		100	20	9	7
30d	22.66	20.03	20.11	16.5857	14.983	20.3985	3.41622	3.46576	3.52079		30d	3.95246	4.01903	4.20059		30d	39	35	11		125	81.3107	82.5127	78.4511		125	82.9624	84.9398	84.8797		125	83.4487	83.1699	82.4096		125	39	35	11
32d	23.98	22.49	22.91	18.8296	19.3019	24.7343	3.44374	3.4364	3.42906		32d	4.73317	4.86631	4.88447		32d	3	5	18		125	79.6278	79.2735	75.1992		125	81.9699	83.0902	82.7744		125	80.1794	79.6218	79.5458		125	3	5	18
34d	25.34	24.72	24.79	21.318	21.3264	26.0334	2.9961	2.99059	3.02362		34d	7.32948	4.86026	4.74527		34d	8	22	13		125	77.7615	77.7552	74.225		125	80.9474	81.4135	81.3609		125	69.3071	79.6472	80.1287		125	8	22	13
36d	26.99	26.29	26.14	25.426	25.3248	26.5058	4.07132	4.02545	4.06765		36d	3.76485	3.62565	3.63776		36d	35	35	60		125	74.6805	74.7564	73.8707		125	79.7068	80.2331	80.3459		125	84.2343	84.8172	84.7665		125	35	35	60
38d	30.5	32	33	24.8946	24.3041	26.1768	4.33917	4.28963	4.24927		38d	3.97062	4.10981	4.23085		38d	52	64	38		125	75.079	75.5219	74.1174		125	77.0677	75.9398	75.188		125	83.3726	82.7897	82.2829		125	52	64	38
40d	28.9	29.1	30	26.219	24.7428	26.4214	5.40888	5.40521	5.30064		40d	4.01298	4.20059	4.18849		40d	37	41	52		125	74.0858	75.1929	73.9339		125	78.2707	78.1203	77.4436		125	83.1952	82.4096	82.4603		125	37	41	52
42d	42	41.16	40.6	36.662	30.3186	36.8476	6.51486	6.63594	6.59925		42d	4.41846	4.64844	4.28532		42d	5	12	14		125	66.2535	71.0111	66.1143		125	68.4211	69.0526	69.4737		125	81.4972	80.5342	82.0548		125	5	12	14
